# Supplementary material for: Gs-DREADD Knock-In Mice for Tissue-Specific, Temporal Stimulation of Cyclic AMP Signaling
Source: PubMed Central journal article supplement (PMC5394278; doi:10.1128/mcb.00584-16), 2017-04-14
Supplement: MCB.00584-16_zmb009171468s1.pdf [file MCB.00584-16_zmb009171468s1.pdf]

Supplemental material

Akhmedov, et al.

Gs-DREADD knock-in mice for tissue-specific, temporal stimulation of cAMP signaling

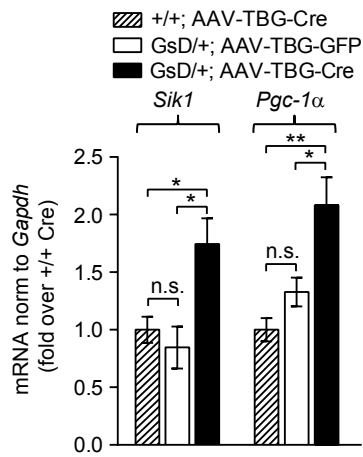

**Supplementary Figure 1. Basal CREB target gene expression is elevated in livers of GsD; AAV-TBG-Cre mice.** *Sik1* and *Pgc-1α* mRNA normalized to *Gapdh*, expressed relative to +/+; AAV-TBG-Cre mice; mean  $\pm$ SEM, n=4-5 per group, \*p<0.05, \*\*p<0.01, \*\*\*p<0.001 by t-tests.

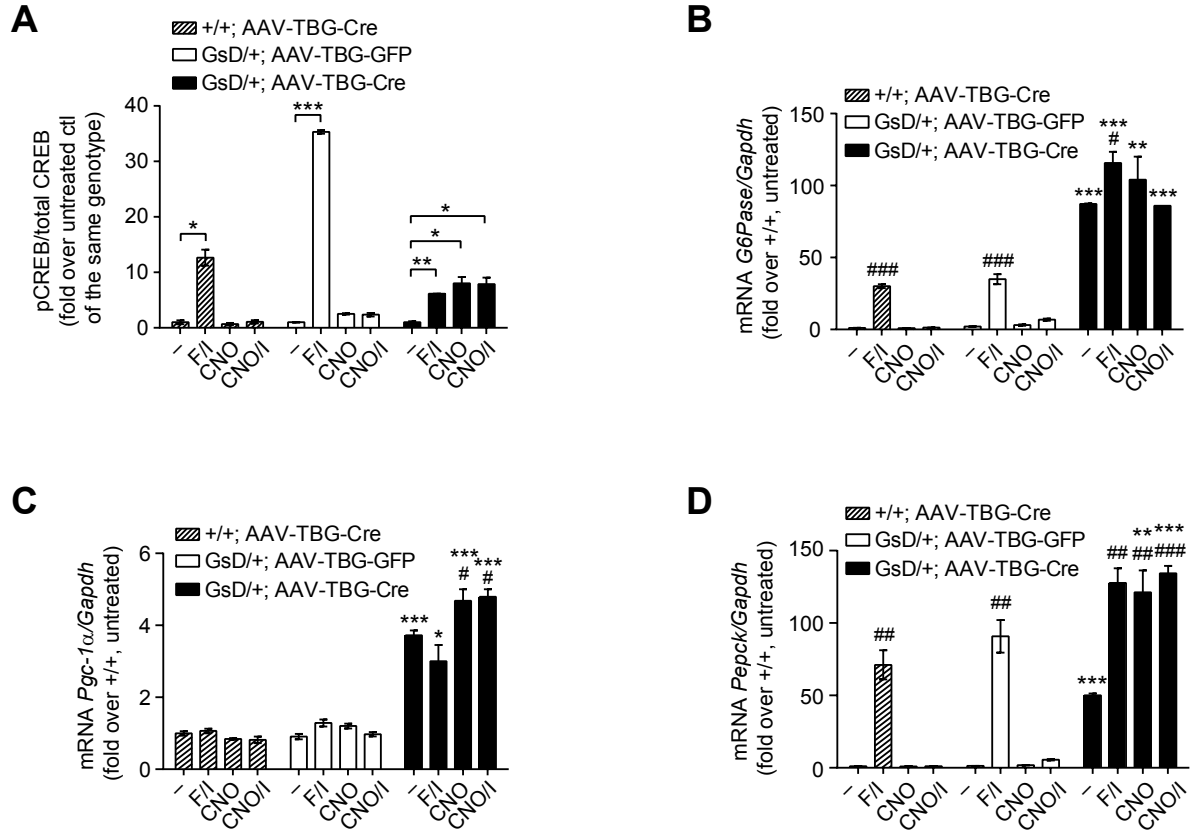

**Supplementary Figure 2. Primary hepatocytes from GsD; AAV-TBG-Cre mice, but not control mice, respond to CNO.** A) Quantification of pCREB western blots shown in Fig 3B. B, C, D) Expression of CREB target genes *G6pase* (B), *Pgc-1α* (C) and *Pepck* (D) in the same samples shown in Fig 3C; mean ± SEM, #: significance vs untreated ctl within the same genotype \*: significance GFP: Cre within each treatment group, \*p<0.05, \*\*p<0.01, \*\*\*p<0.001 by t-tests.

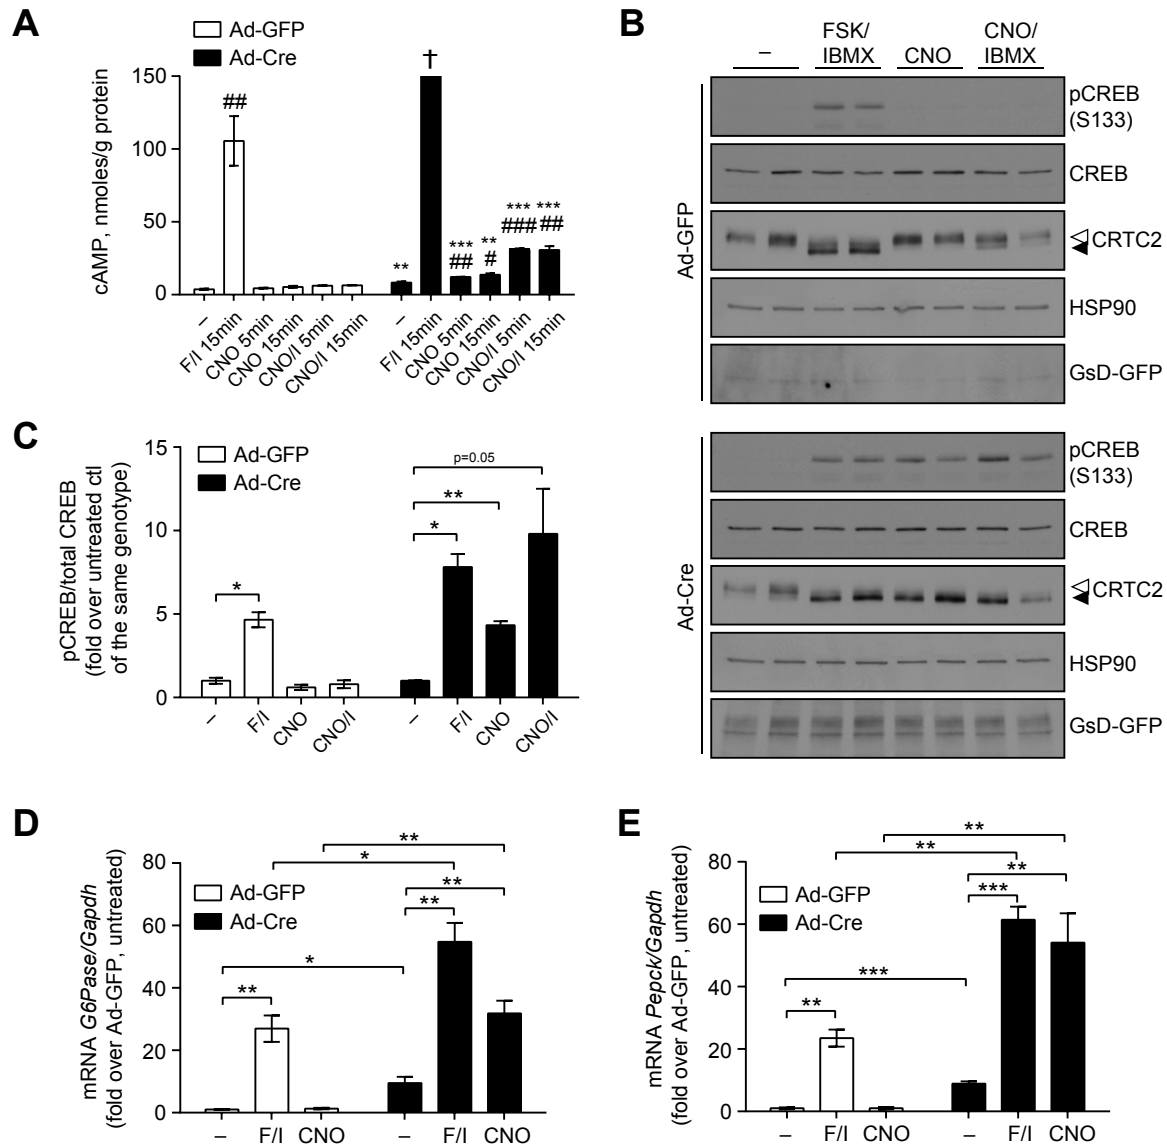

**Supplementary Figure 3. GsD activation stimulates the cAMP-CREB pathway in primary mouse hepatocytes.** Primary hepatocytes were prepared from GsD/+ mice, infected with Ad-GFP or Ad-Cre *ex vivo* and treated with CNO (10  $\mu$ M), CNO (10  $\mu$ M)/IBMX (18  $\mu$ M) or FSK (10  $\mu$ M)/IBMX (18  $\mu$ M). A) cAMP after 5 or 15 min of indicated treatments; mean  $\pm$  SEM; n=3. †: cAMP levels were above the measurement range. #: significance vs untreated ctrl within the same genotype \*: significance GFP: Cre within each treatment group. B) Western blots of phospho-CREB(S133), total CREB and CRTC2 in hepatocytes treated for 15 min as indicated. Open arrowhead, phospho-CRTC2 (inactive); filled arrowhead, dephospho-CRTC2 (active). Duplicates shown; panel is representative of 3 independent experiments performed in duplicate. C) Quantification of pCREB western blots shown in (B). D) *G6Pase* and E) *Pepck* mRNA in hepatocytes treated with FSK (10  $\mu$ M)/IBMX (18  $\mu$ M) or CNO (10  $\mu$ M) (1 hr); mean  $\pm$  SEM. \*p<0.05, \*\*p<0.01, \*\*\*p<0.001 by t-tests; representative of 3 independent experiments performed in triplicate.
